# Supplementary material for: Non-thermal plasma induces AKT degradation through turn-on the MUL1 E3 ligase in head and neck cancer
Source: PubMed Central journal article supplement (PMC4741773; doi:10.18632/oncotarget.5407), 2015-09-30
Supplement: oncotarget-06-33382-s001.pdf [file oncotarget-06-33382-s001.pdf]

## SUPPLEMENTARY FIGURES AND TABLES

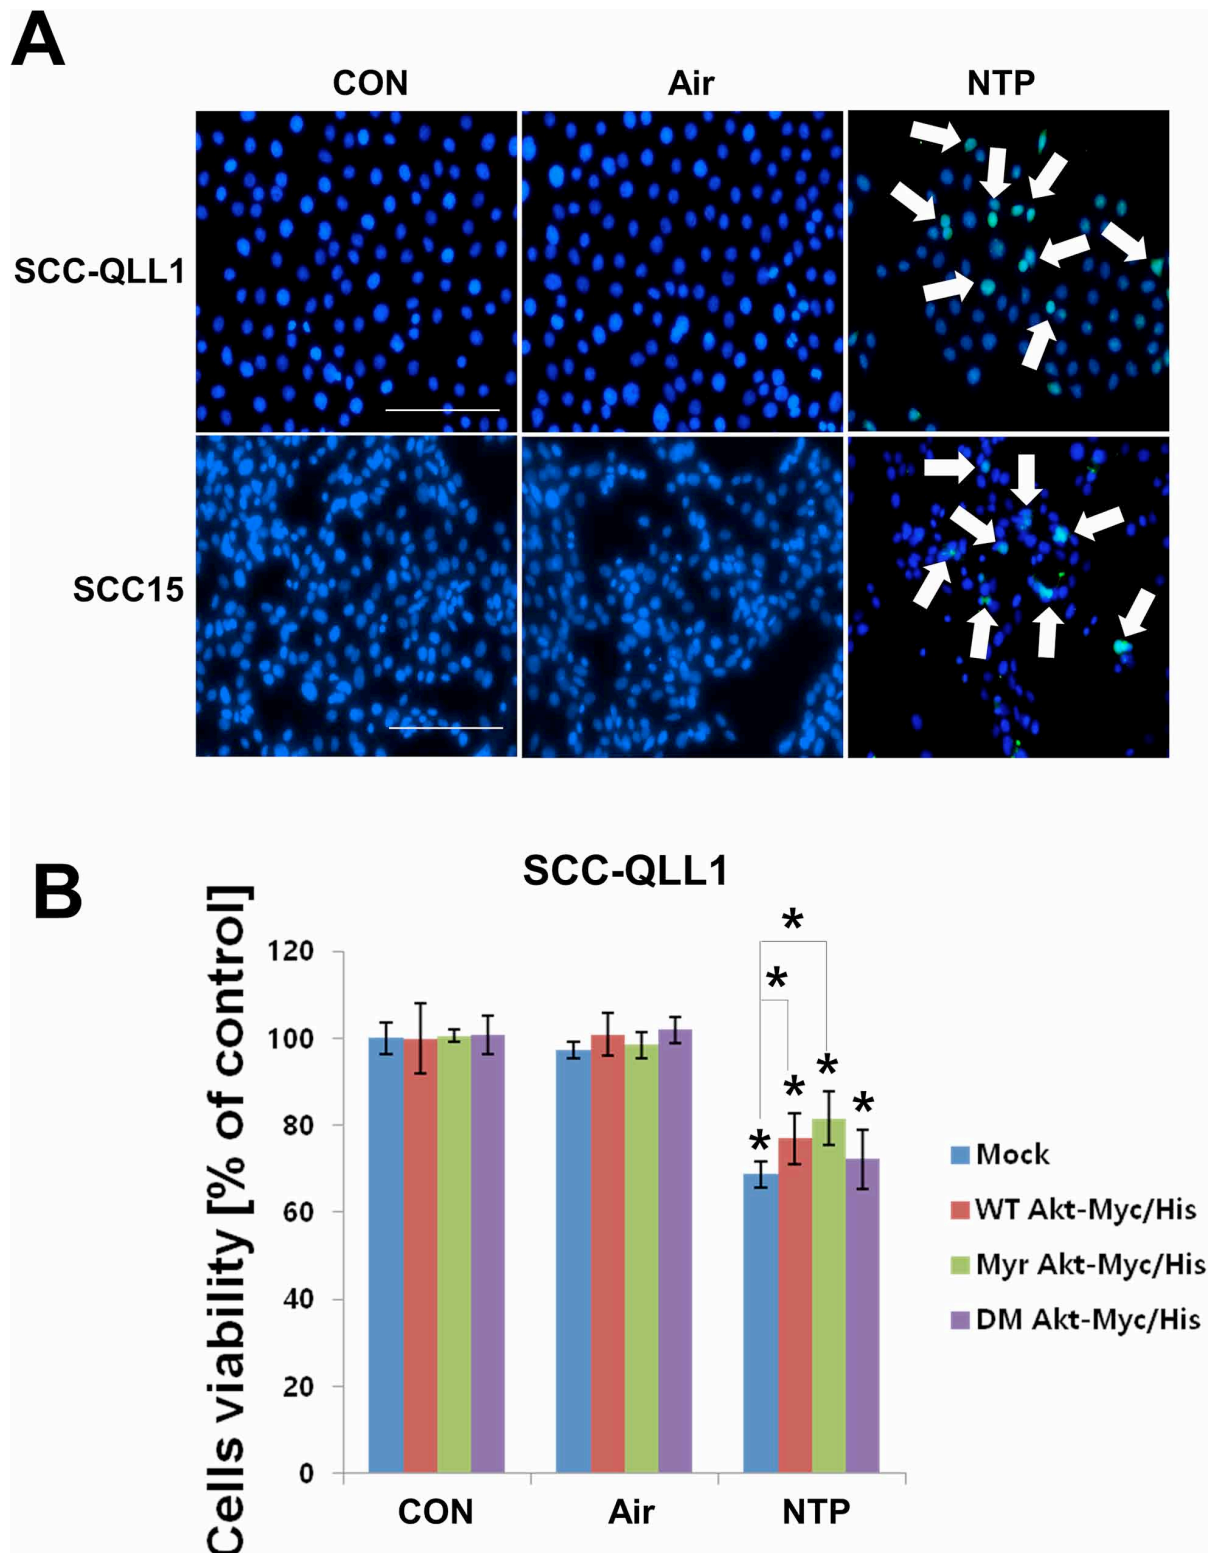

**Supplementary Figure S1: NTP induced HNC apoptotic cell death and active AKT prevented NTP-induced cytotoxicity.** **A.** SCC-QLL1 cells were seeded at cover slip and then, NTP was treated for 24 hours. Cell death was performed with TUNEL staining. Arrows indicates TUNEL positive cells (green). Scale bar = 50  $\mu$ m. **B.** Each indicated plasmids were transfected into SCC-QLL1 cells and then, NTP was treated for 24 hours. Cells viability was determined with MTT assay. Asterisks indicate statistically significant differences ( $P < 0.05$ ). Data are expressed as means  $\pm$  SD.

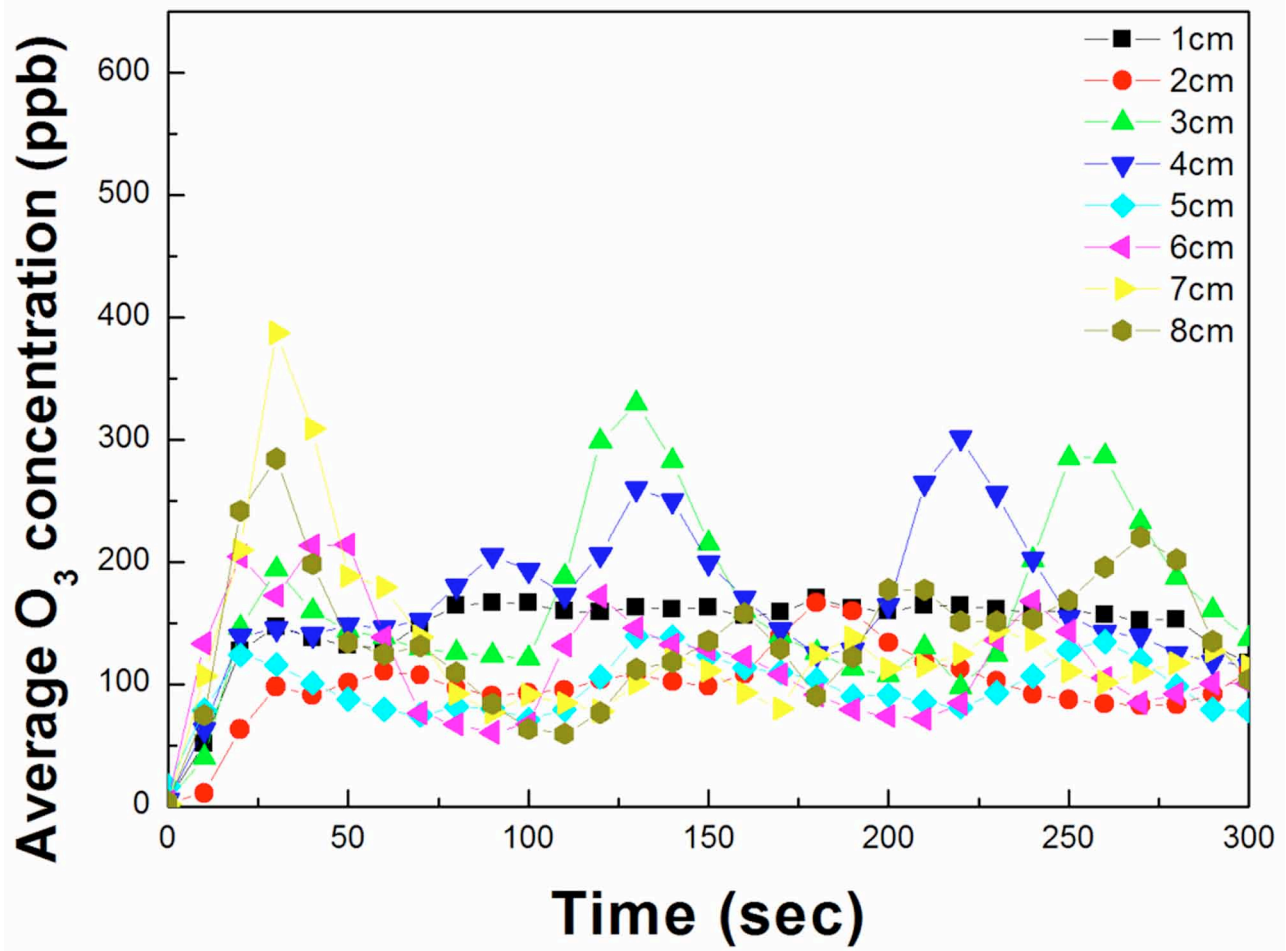

**Supplementary Figure S2: The detection of ozone concentration for LTP preparation optimize.** The method used to prepare liquid-type NTP (LTP) was optimized by testing under several different conditions, varying factors such as distance from the media or treatment time. The ozone concentration was measured by Colorimeter.

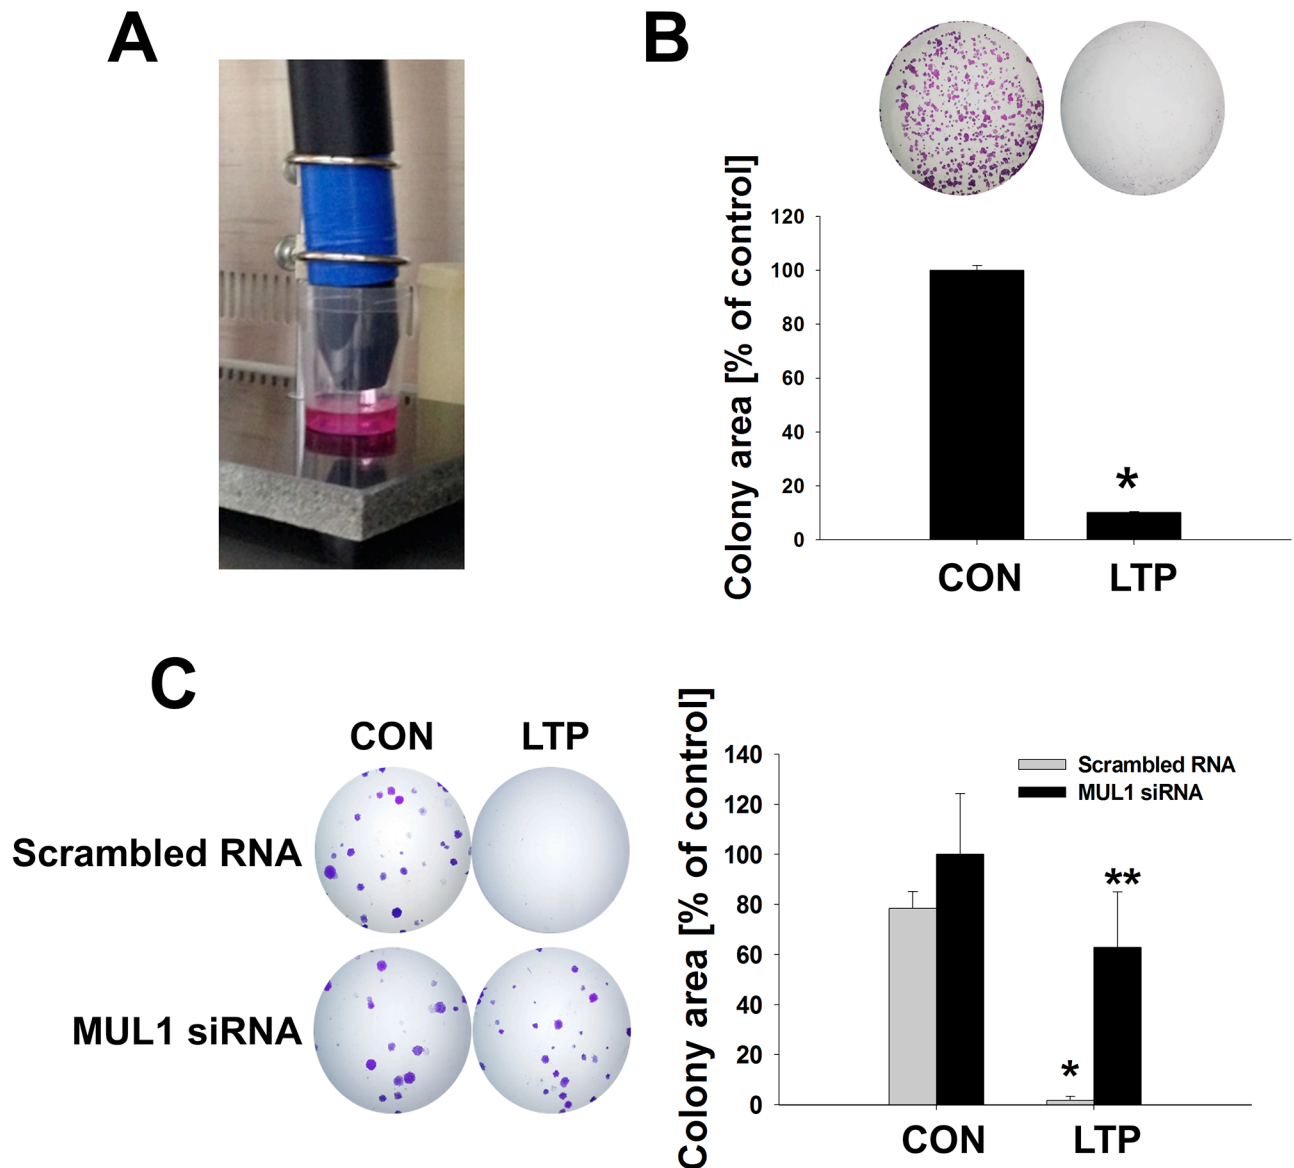

**Supplementary Figure S3: Liquid type of plasma (LTP) preparation and evaluation of anti-cancer effect.** **A.** Scheme of LTP preparation. NTP (He + O<sup>2</sup>, 4 kV) was treated for 15 min at 15 ml of media from the 1~2 cm distance in the absence of serum. **B.** 1,000 cells of SCC-QLL1 seeded on 6-well plate and LTP contained 10% serum was replaced every other day. Colony forming growth was stained with crystal violet. Asterisks indicate statistically significant differences ( $P < 0.05$ ). Data are expressed as means  $\pm$  SD. **C.** LTP-induced inhibition of colony forming growth was prevented in MUL1 knock-downed cells. Scrambled RNA or MUL1 transfected SCC15 cells were seeded at 6-well plate at a density of 1,000 cells. Control media or LTP contained with 10% of serum was replaced at every other day. Asterisks indicate statistically significant differences ( $P < 0.05$ ) between LTP-untreated and LTP treated groups (\* vs CON; \*\* vs scrambled RNA). Data are expressed as means  $\pm$  SD.

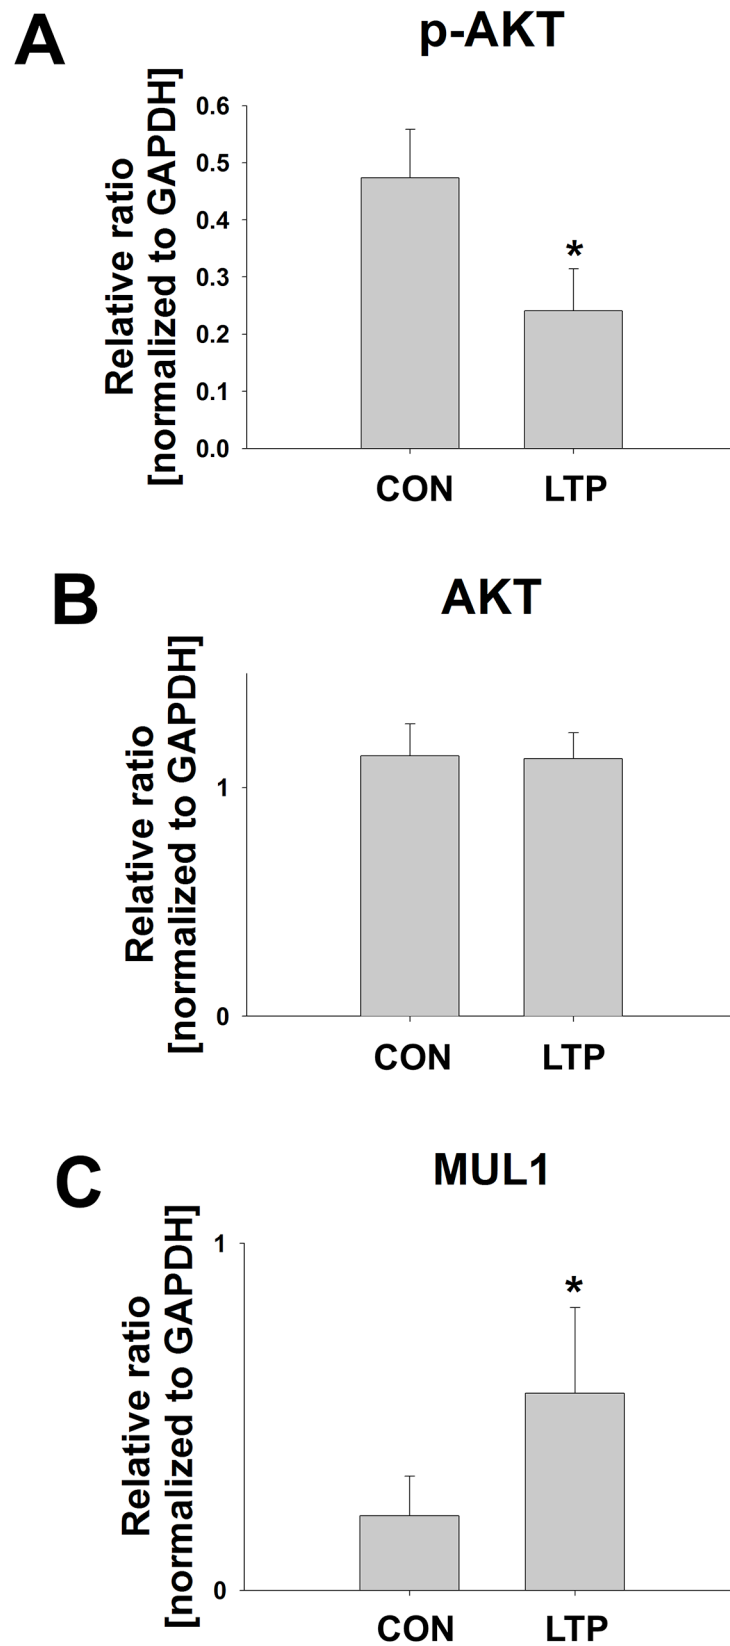

**Supplementary Figure S4: p-AKT, AKT or MUL1 quantitation results.** In Figure 6D western blot analysis results were quantified. **A.** p-AKT. **B.** AKT. **C.** MUL1. Asterisks indicate statistically significant differences ( $P < 0.05$ ,  $n = 8$ ) between LTP -untreated and LTP treated groups. Data are expressed as means  $\pm$  SD.

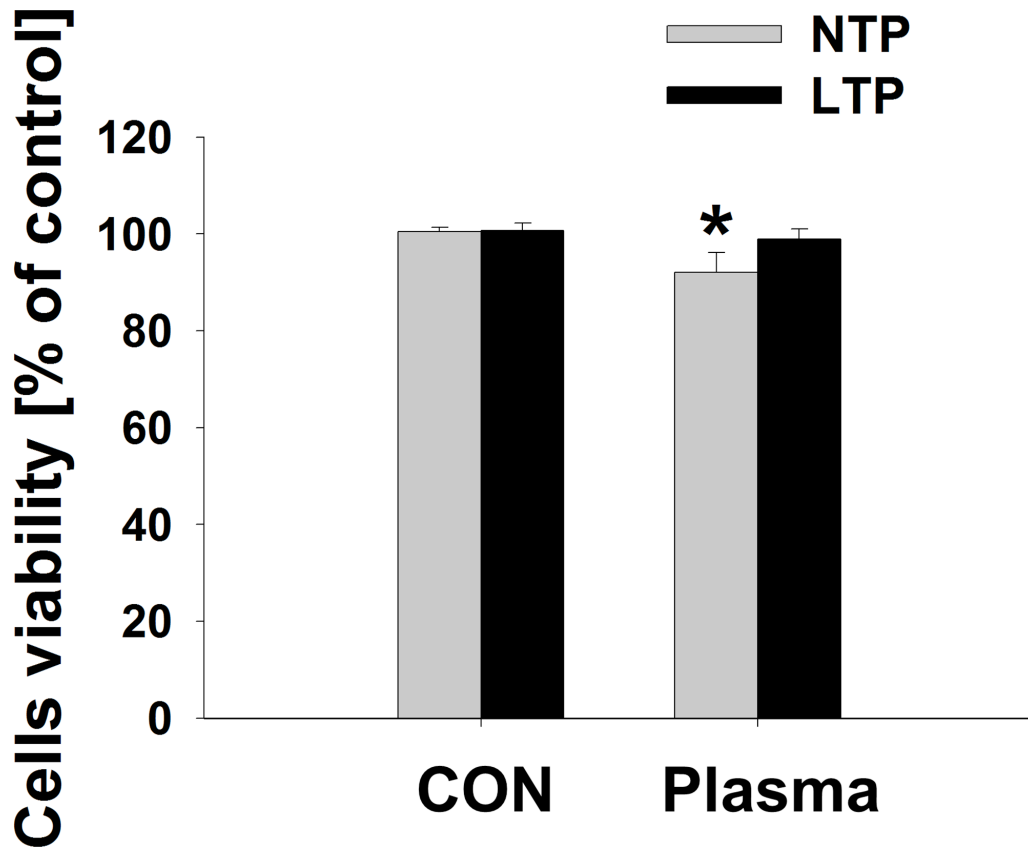

**Supplementary Figure S5: Evaluation of plasma effect in human normal lung fibroblasts (HNLFs).** HNLFs were seeded at 48-well plate and treated with NTP or LTP for 24 hours. Cells viability were determined by MTT assay. Asterisks indicate statistically significant differences ( $P < 0.05$ ) between NTP or LTP -untreated and treated groups. Data are expressed as means  $\pm$  SD.

**A**

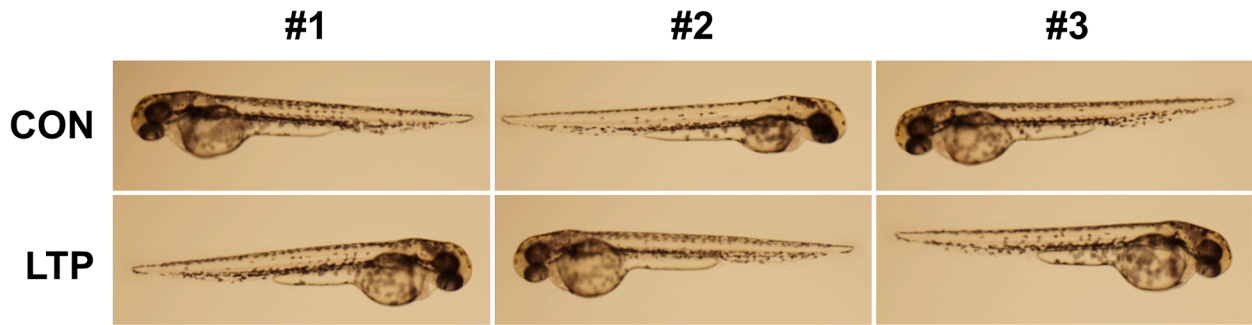

**B**

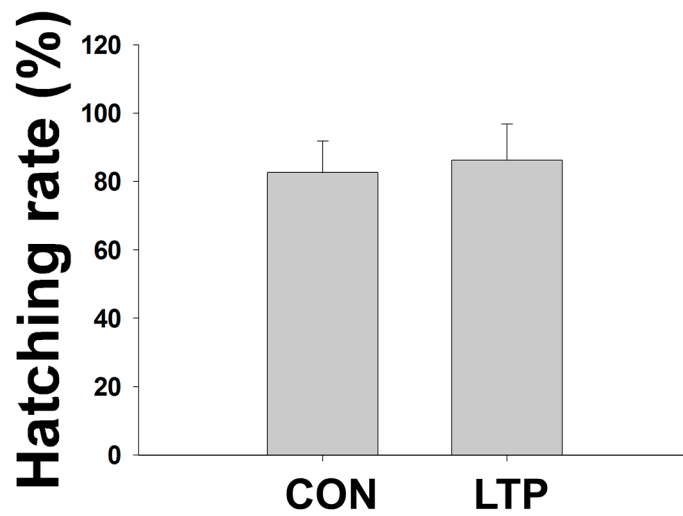

**Supplementary Figure S6: Fish embryo toxicity test (FET) of LTP.** Fresh zebrafish eggs (30 eggs) were incubated in LTP-treated egg water at 37°C for 3 days. On 3 day, fishes were pictured randomly 5 fields each group **A.** and quantified eggs hatching rate (**B.**  $n = 3$ ). Data are expressed as means  $\pm$  SD.

**Supplementary Table S1: Detection of UV A or UV B for NTP preparation optimize**

| Distance | UV A (315 ~ 400 nm)      | UV B (280 ~ 315 nm)      |
|----------|--------------------------|--------------------------|
| 1 cm     | 337 mW / cm <sup>2</sup> | 156 mW / cm <sup>2</sup> |
| 2 cm     | 144 mW / cm <sup>2</sup> | 49 mW / cm <sup>2</sup>  |
| 3 cm     | 98 mW / cm <sup>2</sup>  | 31 mW / cm <sup>2</sup>  |
| 4 cm     | 80 mW / cm <sup>2</sup>  | 19 mW / cm <sup>2</sup>  |
| 5 cm     | 47 mW / cm <sup>2</sup>  | 15 mW / cm <sup>2</sup>  |
| 6 cm     | 40 mW / cm <sup>2</sup>  | 12 mW / cm <sup>2</sup>  |
| 7 cm     | 30 mW / cm <sup>2</sup>  | 9 mW / cm <sup>2</sup>   |
| 8 cm     | 27 mW / cm <sup>2</sup>  | 7 mW / cm <sup>2</sup>   |

**Supplementary Table S2: Detection of ozone or ROS in LTP**

| ROS                                       | Concentration (ppm ± SD) |
|-------------------------------------------|--------------------------|
| Ozone (O <sub>3</sub> )                   | 1.154 ± 0.00145          |
| Hydrogen (H <sub>2</sub> O <sub>2</sub> ) | 1.8333 ± 0.3152          |
| Oxygen (O <sub>2</sub> )                  | 4.767 ± 0.1453           |
| Nitrate (No)                              | 0.1673 ± 0.1663          |

Data are expressed as means ± SD.
